# Supplementary material
Source: PubMed Central journal article supplement (PMC10073526)

*Chua M, et al. Use of timed alarm device for pediatric daytime urinary incontinence: Meta-analysis of comparative studies*

**APPENDIX**

Search strategy on December 2021 and July 2022

MEDLINE Dec 2021

- 1 watch\*.mp. (32446)
- 2 bedwetting.mp. or exp Nocturnal Enuresis/ (1593)
- 3 incontinence\*.mp. or exp Urinary Incontinence/ (62770)
- 4 2 or 3 (64073)
- 5 1 and 4 (140)
- 6 (child\* or ped\* or paed\*).mp. [mp=title, abstract, original title, name of substance word, subject heading word, floating sub-heading word, keyword heading word, organism supplementary concept word, protocol supplementary concept word, rare disease supplementary concept word, unique identifier, synonyms] (2852075)
- 7 5 and 6 (16)

EMBASE Dec 2021

- 1 watch\*.mp. (45266)
- 2 incontinen\*.mp. or exp urine incontinence/ (133375)
- 3 bedwetting.mp. or exp nocturnal enuresis/ (4659)
- 4 (child\* or ped\* or paed\*).mp. [mp=title, abstract, heading word, drug trade name, original title, device manufacturer, drug manufacturer, device trade name, keyword heading word, floating subheading word, candidate term word] (3556316)
- 5 2 or 3 (133402)
- 6 1 and 5 (346)
- 7 4 and 6 (47)

Scopus search strategy Dec 2021 n=43

***Chua M, et al. Use of timed alarm device for pediatric daytime urinary incontinence: Meta-analysis of comparative studies***

( TITLE-ABS-KEY ( watch\* ) ) AND ( ( TITLE-ABS-KEY ( incontinen\* OR bedwet\* OR enuresis ) ) AND ( TITLE-ABS-KEY ( child\* OR ped\* ) ) )

July 2022

**MEDLINE**

▼ Search History (4)

| <input type="checkbox"/> | # ▲ | Searches                                                                                                                                                                                                                                                                                                                     | Results |
|--------------------------|-----|------------------------------------------------------------------------------------------------------------------------------------------------------------------------------------------------------------------------------------------------------------------------------------------------------------------------------|---------|
| <input type="checkbox"/> | 1   | Watch.mp.                                                                                                                                                                                                                                                                                                                    | 10217   |
| <input type="checkbox"/> | 2   | (incontinen* or bedwet* or enuresis).mp. [mp=title, abstract, original title, name of substance word, subject heading word, floating sub-heading word, keyword heading word, organism supplementary concept word, protocol supplementary concept word, rare disease supplementary concept word, unique identifier, synonyms] | 71943   |
| <input type="checkbox"/> | 3   | (child* or ped* or paed*).mp. [mp=title, abstract, original title, name of substance word, subject heading word, floating sub-heading word, keyword heading word, organism supplementary concept word, protocol supplementary concept word, rare disease supplementary concept word, unique identifier, synonyms]            | 2939608 |
| <input type="checkbox"/> | 4   | 1 and 2 and 3                                                                                                                                                                                                                                                                                                                | 9       |

**EMBASE**

| <input type="checkbox"/> | # ▲ | Searches                                                                                                                                                                                                                                     | Results |
|--------------------------|-----|----------------------------------------------------------------------------------------------------------------------------------------------------------------------------------------------------------------------------------------------|---------|
| <input type="checkbox"/> | 1   | Watch.mp.                                                                                                                                                                                                                                    | 15700   |
| <input type="checkbox"/> | 2   | (incontinen* or bedwet* or enuresis).mp. [mp=title, abstract, heading word, drug trade name, original title, device manufacturer, drug manufacturer, device trade name, keyword heading word, floating subheading word, candidate term word] | 137469  |
| <input type="checkbox"/> | 3   | (child* or ped* or paed*).mp. [mp=title, abstract, heading word, drug trade name, original title, device manufacturer, drug manufacturer, device trade name, keyword heading word, floating subheading word, candidate term word]            | 3678821 |
| <input type="checkbox"/> | 4   | 1 and 2 and 3                                                                                                                                                                                                                                | 21      |

**PubMed July 2022**

Search: urinary incontinence AND watch Sort by: Most Recent

("urinary incontinence"[MeSH Terms] OR ("urinary"[All Fields] AND "incontinence"[All Fields]) OR "urinary incontinence"[All Fields]) AND ("watch"[All Fields] OR "watched"[All Fields] OR "watches"[All Fields] OR "watching"[All Fields])

Translations

***Chua M, et al. Use of timed alarm device for pediatric daytime urinary incontinence: Meta-analysis of comparative studies***

urinary incontinence: "urinary incontinence"[MeSH Terms] OR ("urinary"[All Fields] AND "incontinence"[All Fields]) OR "urinary incontinence"[All Fields]

watch: "watch"[All Fields] OR "watched"[All Fields] OR "watches"[All Fields] OR "watching"[All Fields]

40 17:35:46

40 all duplicated

**ClinicalTrials.gov July 2022**

22 Studies found for: **Watch OR alarm | Urinary Incontinence**

21- screening exclude- not focused on daytime urinary incontinence in peds

1- Exclude both intervention group have watch assisted urotherapy

**Googlescholar** search on July 23, 2022

Search term: Alarm watch AND Incontinence

Up to 200 records

6 studies reviewed full text- excluded

1 excluded- assessed wetting alarm diaper vs Toilet training

1 single group before and after urotherapy

1 720 long term fup MNE non MNE cannot subgroup

1 from prospero- night time wetting alarm- Israel

1 review

1 from JpUrol- wrong population – enuresis

**Chua M, et al. Use of timed alarm device for pediatric daytime urinary incontinence: Meta-analysis of comparative studies**

**Supplementary Figure 1.** Per protocol analysis. Forest plot pooled effect estimates for outcome of treatment adherence; comparison: timed alarm vs. control; subgroup: none. Statistical method: inverse variance with random-effect model (relative risk [RR] and 95% confidence interval [CI]).

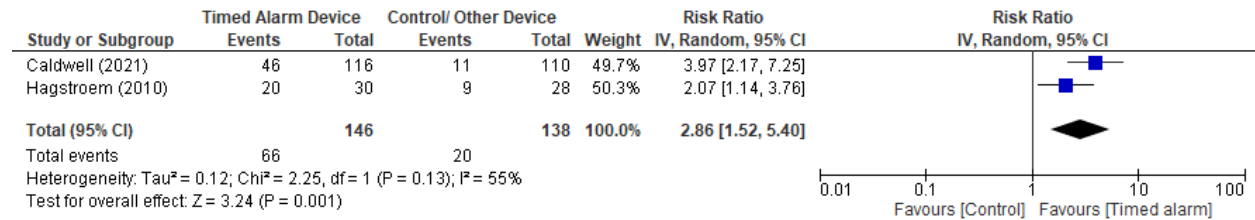

**Supplementary Figure 2.** Funnel plot for visual assessment of publication bias. RCT: randomized control trial.

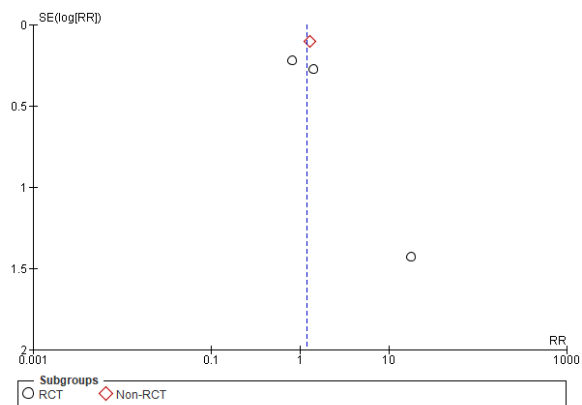

Supplement: 8113_Appendix.pdf [file 8113_Appendix.pdf]
